# Supplementary material for: The Microgeographical Patterns of Morphological and Molecular Variation of a Mixed Ploidy Population in the Species Complex Actinidia chinensis
Source: PubMed Central journal article supplement (PMC4319829; doi:10.1371/journal.pone.0117596), 2015-02-06
Supplement: pone.0117596.s008.pdf [file pone.0117596.s008.pdf]

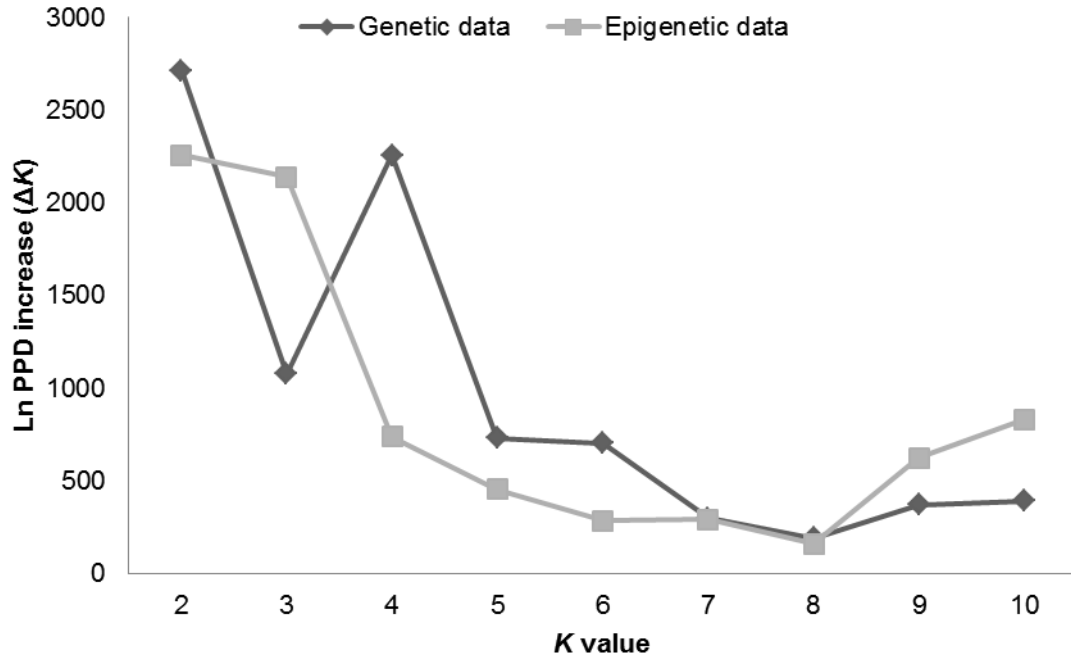

**Figure S1** The increase of the posterior probability of the data (PPD) of given  $K$  in STRUCTURE analyses. For  $K$  values from 1 to 10, this increase is calculated as  $\Delta K = \text{Ln PPD}_K - \text{Ln PPD}_{K-1}$ .
